# Supplementary material
Source: PubMed Central journal article supplement (PMC2718749)

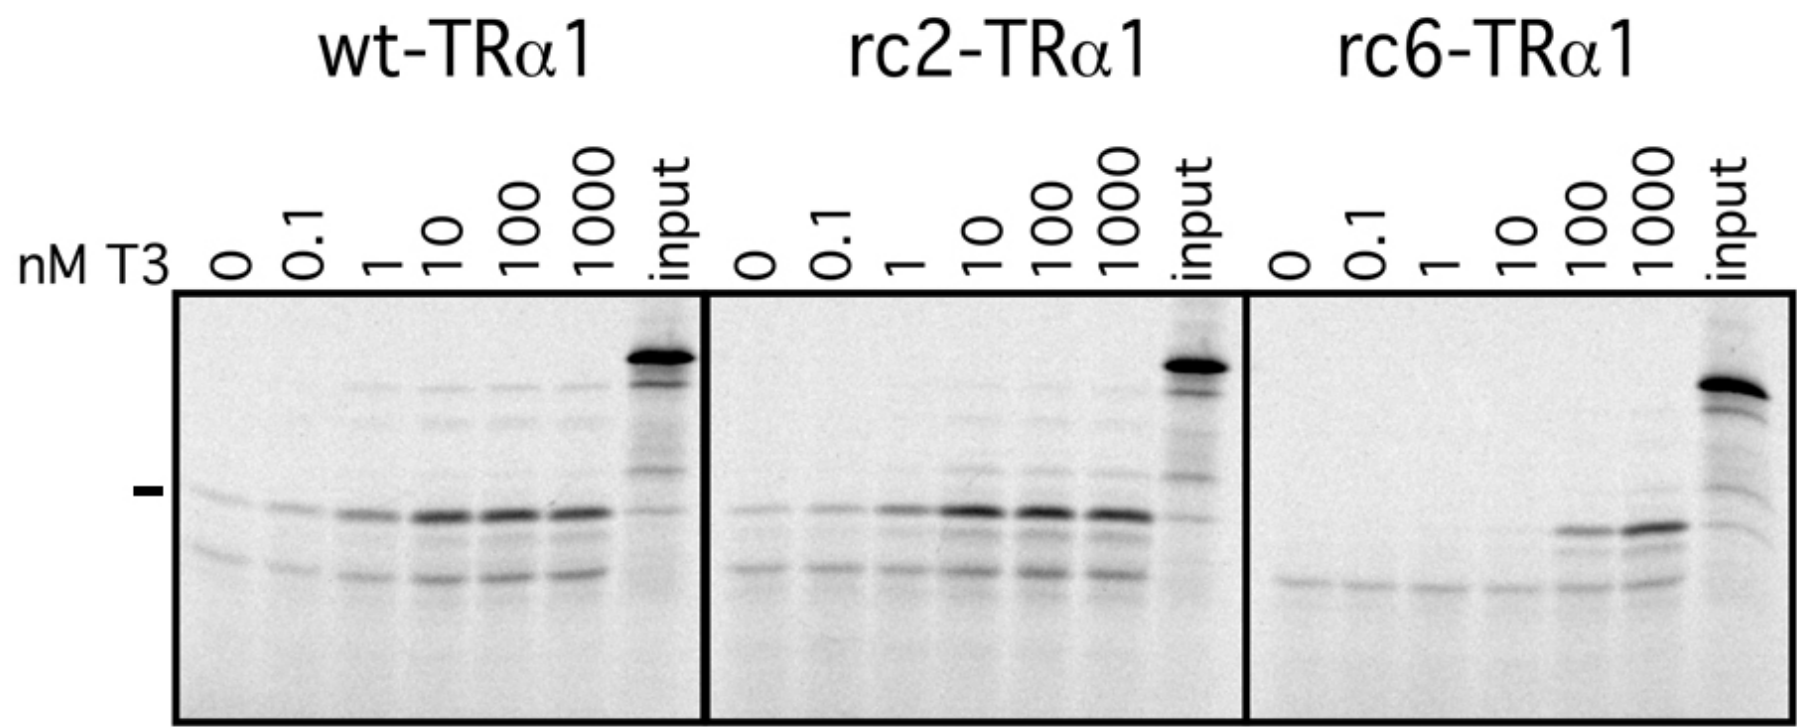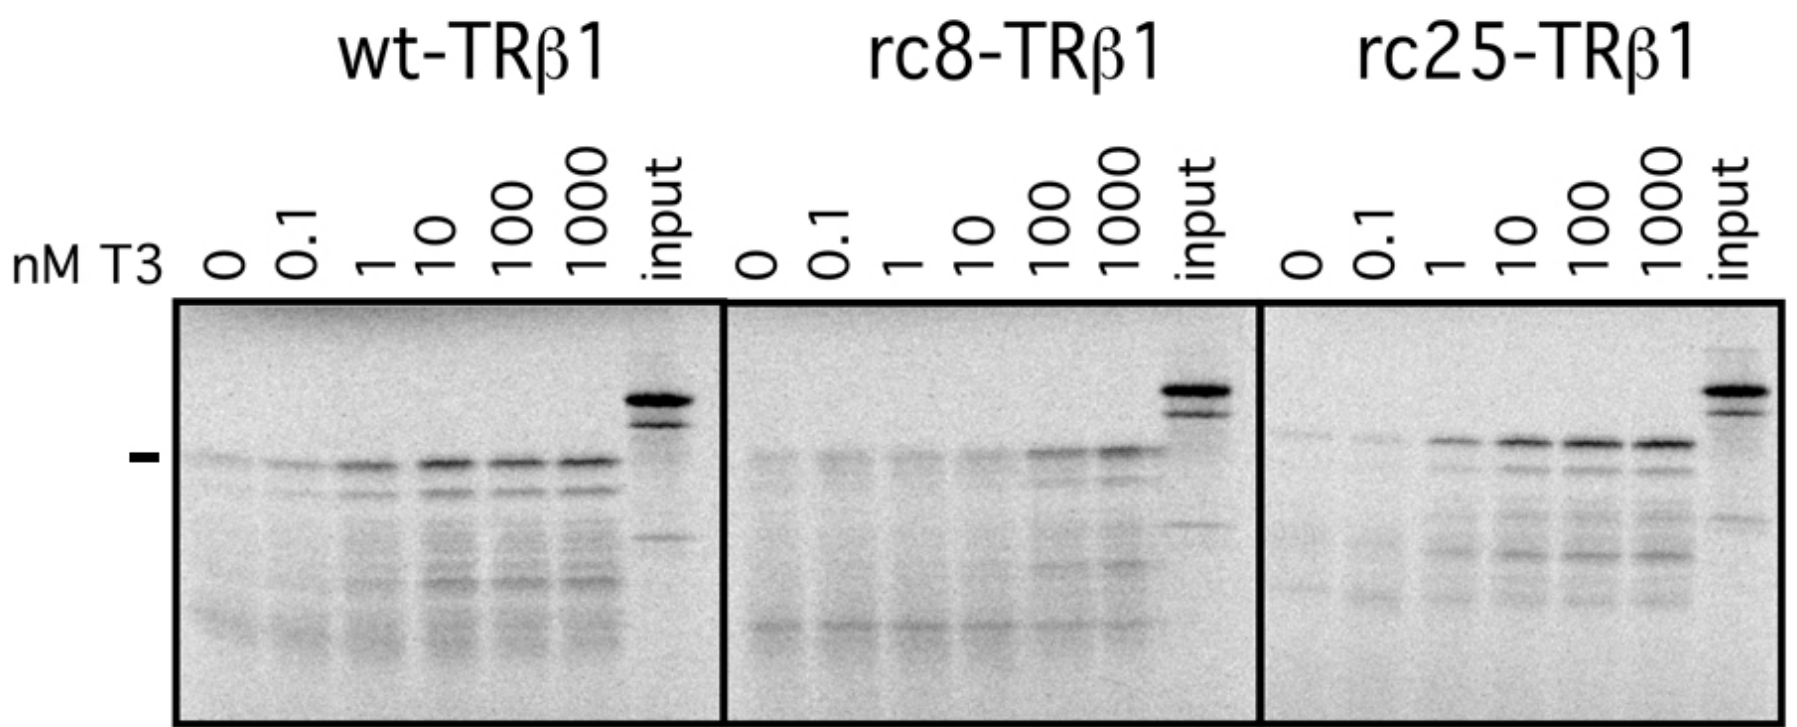

Supplement: me.2009-0126_1.pdf [file me.2009-0126_1.pdf]

Binding to CoRNR boxes (minus T3 = 100)

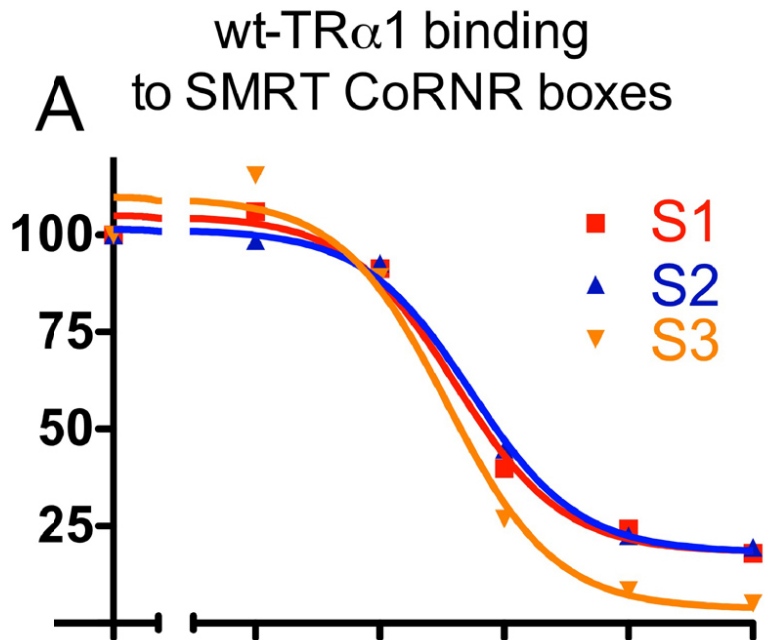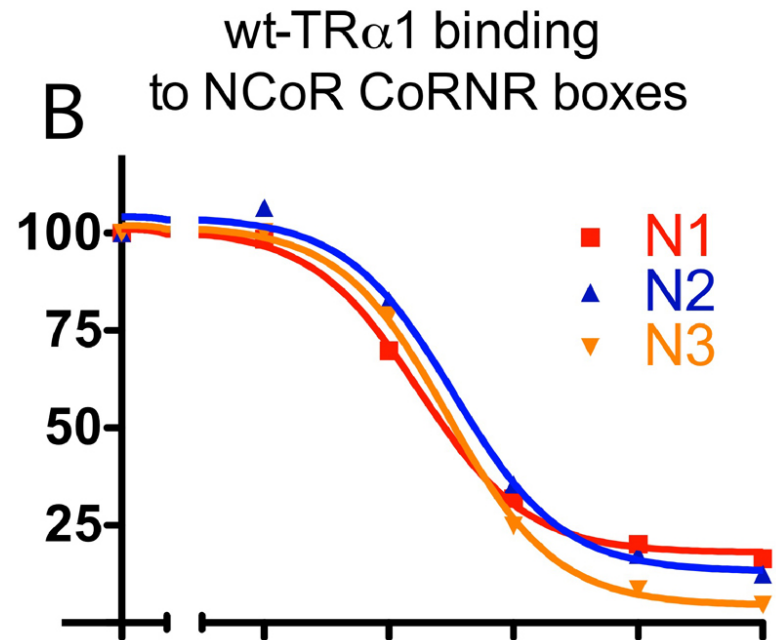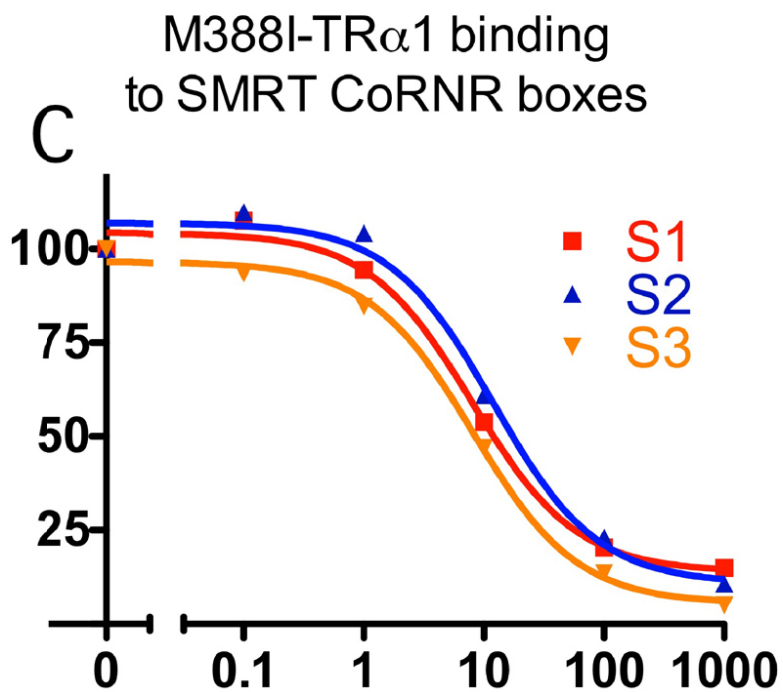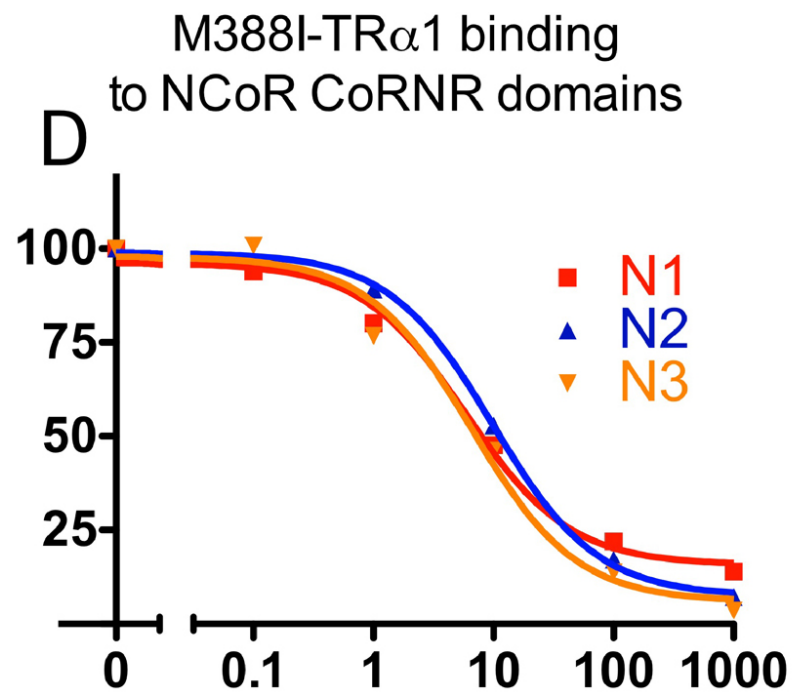

nM T3

Supplement: me.2009-0126_2.pdf [file me.2009-0126_2.pdf]
